# Supplementary material for: Remote Sensing Approach for Monitoring Coastal Wetland in the Mekong Delta, Vietnam: Change Trends and Their Driving Forces
Source: MDPI journal article supplement (doi:10.3390/rs13173359), 2021-08-25
Supplement: s1 [file s1]

## SUPPLEMENTARY DOCUMENT

**Formula S1.** Conversion of DN images (Landsat 8 OLI) to surface reflectance images (Landsat, 2016).

The DN values were converted into top of the atmosphere (TOA) reflectance without sun angle correction using the following formula:

$$p\lambda' = M_p Q_{cal} + A_p$$

**Where**  $p\lambda'$ : TOA planetary reflectance, without correction for solar angle. Note that  $p\lambda$  does not contain a correction for the sun angle;  $M_p$ : Band-specific multiplicative rescaling factor from the metadata (REFLECTANCE\_MULT\_- BAND\_x, where x is the band number);  $A_p$ : Band-specific additive rescaling factor from the metadata (REFLECTANCE\_ADD\_BAND\_x, where x is the band number);  $Q_{cal}$ : Quantized and calibrated standard product pixel values (DN).

Afterward, the Sun Angle correction have been achieved using the following formula:

$$p\lambda = p\lambda' / \cos(\theta_{sz}) = p\lambda' / \sin(\theta_{se})$$

**Where**  $p\lambda$ : TOA planetary reflectance;  $\theta_{se}$ : Local sun elevation angle, The scene center sun elevation angle in degrees is provided in the metadata (SUN\_ELEVATION);  $\theta_{sz}$ : Local solar zenith angle;  $\theta_{sz} = 90^\circ - \theta_{se}$

**Table S1.** Wetland transition statistics (1995-2002); (1): *marine water bodies* (2): *inland water bodies*, (3): *mangrove forests*, (4): *sparse mangrove/saltmarshes*, (5): *forested wetlands*, (6): *rice fields/other crops*, (7): *aquaculture ponds*.

|                       |     | 1995 |      |       |      |       |      |        |       |       |      |         |       |        |       | Coverage<br>2002 |
|-----------------------|-----|------|------|-------|------|-------|------|--------|-------|-------|------|---------|-------|--------|-------|------------------|
| Wetland<br>classes    |     | (1)  |      | (2)   |      | (3)   |      | (4)    |       | (5)   |      | (6)     |       | (7)    |       |                  |
|                       |     | km²  | %    | km²   | %    | km²   | %    | km²    | %     | km²   | %    | km²     | %     | km²    | %     |                  |
| 2002                  | (1) | 18.2 | 52.5 | 0.6   | 0.4  | 17.7  | 2.9  | 1.4    | 0.2   | 0.0   | 0.0  | 0.1     | 0.0   | 0.6    | 0.1   | 38.6             |
|                       | (2) | 0.8  | 2.4  | 126.7 | 89.6 | 5.0   | 0.8  | 0.0    | 0.0   | 0.0   | 0.0  | 0.0     | 0.0   | 0.0    | 0.0   | 139.7            |
|                       | (3) | 15.2 | 43.9 | 0.0   | 0.0  | 361.7 | 59.2 | 148.2  | 23.3  | 0.0   | 0.0  | 0.0     | 0.0   | 71.0   | 10.7  | 596.1            |
|                       | (4) | 0.3  | 0.7  | 0.0   | 0.0  | 115.5 | 18.9 | 163.3  | 25.7  | 0.0   | 0.0  | 33.5    | 1.1   | 71.2   | 10.8  | 383.8            |
|                       | (5) | 0.0  | 0.0  | 14.1  | 10.0 | 0.0   | 0.0  | 0.0    | 0.0   | 520.2 | 83.7 | 66.1    | 2.2   | 0.0    | 0.0   | 600.4            |
|                       | (6) | 0.0  | 0.0  | 0.0   | 0.0  | 0.0   | 0.0  | 0.0    | 0.0   | 90.9  | 14.6 | 1642.9  | 54.1  | 0.0    | 0.0   | 1733.7           |
|                       | (7) | 0.0  | 0.0  | 0.0   | 0.0  | 108.1 | 17.7 | 286.7  | 45.2  | 6.0   | 1.0  | 1104.6  | 36.4  | 518.6  | 78.4  | 2054.7           |
| Coverage 1995         |     | 34.6 | -    | 141.4 | -    | 611.0 | -    | 634.5  | -     | 621.4 | -    | 3036.8  | -     | 661.4  | -     | -                |
| Class Changes         |     | 16.3 | 47.0 | 14.7  | 10.4 | 246.3 | 40.3 | 436.3  | 68.8  | 96.9  | 15.6 | 1204.2  | 39.7  | 142.8  | 21.6  | 16.3             |
| Change<br>(1995-2002) |     | 4.0  | 11.6 | -1.8  | -1.2 | -15.0 | -2.5 | -250.8 | -39.5 | -21.0 | -3.4 | -1303.1 | -42.9 | 1393.3 | 210.7 | -                |

**Table S2. Wetland transition statistics (2002-2013)**

| 2002               |     |                 |      |                 |      |                 |      |                 |      |                 |       |                 |      |                 |      |               |
|--------------------|-----|-----------------|------|-----------------|------|-----------------|------|-----------------|------|-----------------|-------|-----------------|------|-----------------|------|---------------|
| Wetland classes    |     | (1)             |      | (2)             |      | (3)             |      | (4)             |      | (5)             |       | (6)             |      | (7)             |      | Coverage 2013 |
|                    |     | km <sup>2</sup> | %     | km <sup>2</sup> | %    | km <sup>2</sup> | %    |               |
| 2013               | (1) | 28.1            | 72.7 | 2.1             | 1.5  | 34.2            | 5.7  | 2.7             | 0.7  | 0.0             | 0.0   | 2.2             | 0.1  | 2.8             | 0.1  | 72.1          |
|                    | (2) | 0.5             | 1.2  | 135.8           | 97.2 | 0.0             | 0.0  | 0.0             | 0.0  | 2.6             | 0.4   | 0.0             | 0.0  | 0.0             | 0.0  | 138.9         |
|                    | (3) | 9.4             | 24.2 | 0.0             | 0.0  | 371.8           | 62.4 | 114.3           | 29.8 | 0.1             | 0.0   | 0.0             | 0.0  | 73.6            | 3.6  | 569.2         |
|                    | (4) | 0.7             | 1.9  | 0.0             | 0.0  | 120.9           | 20.3 | 160.8           | 41.9 | 0.0             | 0.0   | 0.3             | 0.0  | 119.3           | 5.8  | 470.8         |
|                    | (5) | 0.0             | 0.0  | 0.0             | 0.0  | 0.0             | 0.0  | 0.0             | 0.0  | 447.2           | 74.5  | 59.1            | 3.4  | 0.0             | 0.0  | 513.1         |
|                    | (6) | 0.0             | 0.0  | 0.0             | 0.0  | 0.0             | 0.0  | 0.0             | 0.0  | 139.5           | 23.2  | 1470.1          | 84.8 | 63.4            | 3.1  | 1673.1        |
|                    | (7) | 0.0             | 0.0  | 0.0             | 0.0  | 62.2            | 10.4 | 106.0           | 27.6 | 10.9            | 1.8   | 194.2           | 11.2 | 1709.9          | 83.2 | 2083.2        |
| Coverage 2002      |     | 38.6            | -    | 139.7           | -    | 596.1           | -    | 383.8           | -    | 600.4           | -     | 1733.7          | -    | 2054.7          | -    | -             |
| Class Changes      |     | 10.6            | 27.3 | 2.1             | 1.5  | 217.2           | 36.4 | 223.0           | 58.1 | 153.1           | 25.5  | 255.8           | 14.8 | 259.1           | 12.6 | -             |
| Change (2002-2013) |     | 33.5            | 86.6 | -0.8            | -0.6 | -26.9           | -4.5 | 87.0            | 22.7 | -87.3           | -14.5 | -60.6           | -3.5 | 28.5            | 1.4  | -             |

**Table S3. Wetland transition statistics (2013-2020)**

| 2013               |     |                 |      |                 |      |                 |      |                 |       |                 |       |                 |       |                 |      |               |
|--------------------|-----|-----------------|------|-----------------|------|-----------------|------|-----------------|-------|-----------------|-------|-----------------|-------|-----------------|------|---------------|
| Wetland classes    |     | (1)             |      | (2)             |      | (3)             |      | (4)             |       | (5)             |       | (6)             |       | (7)             |      | Coverage 2020 |
|                    |     | km <sup>2</sup> | %     | km <sup>2</sup> | %     | km <sup>2</sup> | %     | km <sup>2</sup> | %    |               |
| 2020               | (1) | 62.6            | 86.8 | 0.7             | 0.5  | 13.3            | 2.3  | 1.3             | 0.3   | 0.0             | 0.0   | 0.1             | 0.0   | 0.6             | 0.0  | 79.3          |
|                    | (2) | 0.4             | 0.5  | 125.4           | 90.3 | 4.1             | 0.7  | 2.7             | 0.6   | 0.0             | 0.0   | 0.0             | 0.0   | 0.0             | 0.0  | 132.6         |
|                    | (3) | 8.8             | 12.2 | 0.0             | 0.0  | 416.4           | 73.1 | 123.5           | 26.2  | 0.0             | 0.0   | 0.0             | 0.0   | 32.4            | 1.6  | 581.0         |
|                    | (4) | 0.3             | 0.5  | 0.0             | 0.0  | 108.5           | 19.1 | 181.2           | 38.5  | 0.0             | 0.0   | 1.0             | 0.1   | 84.4            | 4.1  | 375.4         |
|                    | (5) | 0.0             | 0.0  | 0.0             | 0.0  | 0.0             | 0.0  | 0.0             | 0.0   | 381.1           | 74.3  | 42.8            | 2.6   | 0.0             | 0.0  | 423.8         |
|                    | (6) | 0.0             | 0.0  | 0.0             | 0.0  | 0.0             | 0.0  | 0.0             | 0.0   | 83.5            | 16.3  | 748.7           | 44.7  | 0.0             | 0.0  | 832.2         |
|                    | (7) | 0.0             | 0.0  | 0.0             | 0.0  | 25.1            | 4.4  | 61.3            | 13.0  | 39.5            | 7.7   | 801.5           | 47.9  | 1965.8          | 94.4 | 2942.9        |
| Coverage 2013      |     | 72.1            | -    | 138.9           | -    | 569.2           | -    | 470.8           | -     | 513.1           | -     | 1673.1          | -     | 2083.2          | -    | -             |
| Class Changes      |     | 9.5             | 13.2 | 0.7             | 0.5  | 150.9           | 26.5 | 188.7           | 40.1  | 123.0           | 24.0  | 845.3           | 50.5  | 117.3           | 9.5  | -             |
| Change (2013-2020) |     | 7.3             | 10.1 | -6.3            | -4.5 | 11.8            | 2.1  | -95.5           | -20.3 | -89.3           | -17.4 | -840.9          | -50.3 | 859.7           | 41.3 | -             |

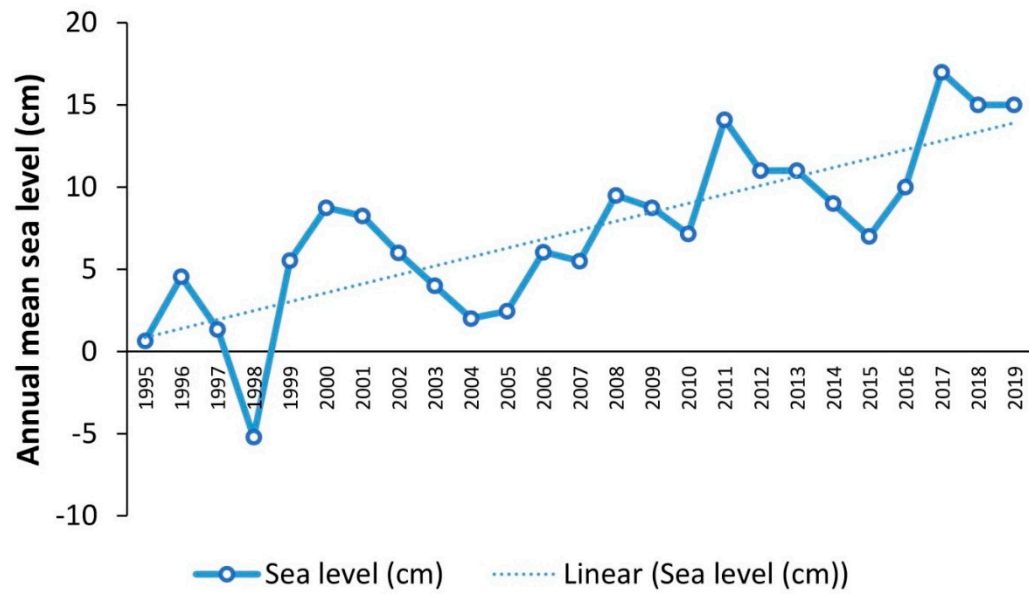

**Figure S1.** Sea level trend in the west sea of the Mekong Delta, Vietnam (1995-2019).

## Reference

Landsat, U. S. G. S. (2016). 8 (L8) Data Users Handbook Version 2.0. *EROS, Sioux Falls, South Dakota*.
